# Supplementary material for: Direct and Allosteric Inhibition of the FGF2/HSPGs/FGFR1 Ternary Complex Formation by an Antiangiogenic, Thrombospondin-1-Mimic Small Molecule
Source: PLoS One. 2012 May 14;7(5):e36990. doi: 10.1371/journal.pone.0036990 (PMC3351436; doi:10.1371/journal.pone.0036990)
Supplement: Table S3 — Statistics of the top three FGF2-sm27 clusters obtained with HADDOCK. (DOC) [file pone.0036990.s010.doc]

**Table S3. Statistics of the top three FGF2-sm27 clusters obtained with HADDOCK.**

| **Cluster** | **Haddock score** | **RMSD-Emina** | **Nb** | **Evdwc** | **Eelecc** | **BSAd (Å2)** | **Edesolve** |
| --- | --- | --- | --- | --- | --- | --- | --- |
| 1 | -233.06 ± 28.51 | 1.63 ± 0.13 | 82 | -18.1 ± 3.0 | -217.1 ± 28.7 | 609.24± 21.5 | 1.32 ± 4.59 |
| 2 | -198.49 ± 8.41 | 1.59 ±0.06 | 21 | -26.0 ± 2.0 | -172.5 ± 9.5 | 622.1 ± 3.7 | 0.16 ± 3.46 |
| 3 | -215.12 ± 19.22 | 1.63 ± 0.13 | 16 | -23.2 ± 1.3 | -192.2 ± 18.8 | 628.7 ± 20.0 | -0.25 ± 9.14 |

aOverall backbone RMSD from the lowest energy structure.

bNumber of structures in a given cluster.

cThe intermolecular energies (kcal mol-1) were calculated with the OPLS parameters using a 8.5 Å cut-off.

dBuried surface area (Å2).

eThe desolvatation energy (kcal mol-1) was calculated using the atomic desolvation parameters by Fernandez-Recio et al. (Fernandez-Recio, J., Totrov, M., and Abagyan, R. (2004) Journal of Molecular Biology 335, 843-865).
